# Supplementary material for: Protective Effect of Natural Antioxidant Compounds on Methimazole Induced Oxidative Stress in a Feline Kidney Epithelial Cell Line (CRFK)
Source: MDPI journal article supplement (doi:10.3390/vetsci8100220), 2021-10-08
Supplement: s1 [file s1]

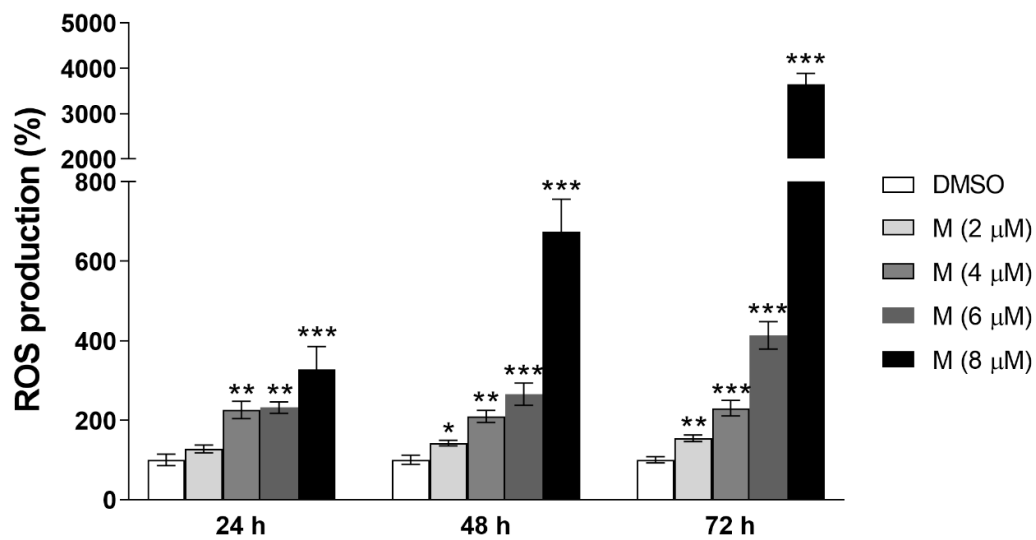

**Figure S1.** Effects of menadione (M) on ROS production in CRFK cells, measured with the DCFH-DA assay. Cells were exposed to menadione (2, 4, 6 and 8  $\mu$ M) for 24, 48, and 72 h. Results are expressed as a percentage of ROS production compared to the solvent control (0.1% DMSO). Data are represented as mean  $\pm$  SEM of three independent experiments and analyzed by one-way ANOVA followed by Dunnett's test. Statistical differences with respect to the controls are indicated (\*  $p < 0.05$ ; \*\*  $p < 0.01$ ; \*\*\*  $p < 0.001$ ).
